# Supplementary material
Source: Royal Society of Chemistry journal article supplement (doi:10.1039/d6cc01514j)
Supplement: d6cc01514j1.pdf [file d6cc01514j1.pdf]

# Supporting Information for

## Upcycling Disposed Sunscreen Waste into

## Supported Catalysts for Environmental

## Purification

*Toshiki Shimiza<sup>a</sup>, Fuminao Kishimoto<sup>\*a</sup>, Yasuhiro Sakamoto<sup>a</sup>, Minh Thuan Pham<sup>b</sup>, Ryo Sasaki<sup>c</sup>, Rie Ito<sup>c</sup>, Kazuhiro Takanabe<sup>\*a</sup>*

<sup>a</sup> Department of Chemical System Engineering, School of Engineering, The University of Tokyo, 7-3-1 Hongo, Bunkyo-ku, Tokyo 113-8656, Japan.

<sup>b</sup> Center for Environmental Toxin and Emerging-Contaminant Research, Cheng Shiu University, Kaohsiung City, Taiwan

<sup>c</sup> KOSÉ Holdings Corporation, 48-18 Sakae-cho, Kita-ku, Tokyo 114-0005, Japan.

## **Experimental methods**

### **Materials**

Cosmetic grade ZnO samples (untreated and dimethicone modified) were purchased from Tayca Corporation. Hexachloroplatinic(IV) acid ( $\text{H}_2\text{PtCl}_6$ ), was purchased from FUJIFILM Wako Pure Chemical Corporation. Ethanol ( $\text{C}_2\text{H}_5\text{OH}$ ) was purchased from Sigma-Aldrich Japan G.K. These chemicals were used without any pretreatment.

### **Pt/ZnO prepared from pristine ZnO, and functionalized ZnO**

ZnO powder or sunscreen products (ZnO basis 0.5 g) was stirred into 45 mL ultrapure water and ethanol 30 mL. The suspension was ultra sonicated. Then, 1.28 mL of 0.04 M  $\text{H}_2\text{PtCl}_6$  aqueous solution was added, which corresponded to 1 wt%. The suspension was irradiated with 370 nm UV-LED (Asahi Spectra Co., Ltd.; CL-1501) for 12 h with stirring. After UV irradiation, suspension was suction-filtered and dried in an oven at 60 °C overnight. Sample was then calcined at 550 °C for 4h, and Pt/ZnO was obtained.

### **CO oxidation reaction**

Prior to activity measurements, all samples were pelletized with 60:1  $\text{Al}_2\text{O}_3$ :catalyst interpellet dilution<sup>1</sup> and sieved to a particle diameter of 250–500  $\mu\text{m}$ . Each sample (80 mg) was placed in a quartz tube with inner diameter of 4 mm suspended by quartz wool. The quartz reactor was then placed in a furnace. Before reaction, reduction of catalyst was conducted under  $\text{H}_2$  at 300 °C for 30 min. Reaction was conducted for CO partial pressure of 0.10 kPa,  $\text{O}_2$  partial pressure of 10 kPa, and balanced with Ar with total flowrate of 100  $\text{mL min}^{-1}$  at 170 °C.

### **Characterizations**

The absorption spectra of sunscreens were obtained by UV–vis measurements (V-770, JASCO Corp.). Inductively coupled plasma optical emission spectrometry measurements were also performed (ICP-OES, Agilent 5110 VDV). Thermogravimetry differential thermal analysis (TG-DTA) was performed on a Shimadzu DTG-60H. Samples were placed in an alumina pan and heated to 800 °C at a rate of 10 °C min<sup>-1</sup> under an air flow of 100 mL min<sup>-1</sup>. XRD spectra (Rigaku, RINT-2000) were measured using Cu K $\alpha$  radiation at 25 °C. The samples were scanned from 20° to 60° at 10° min<sup>-1</sup>, and the average of 10 measurements was taken. XAS was carried out at the beamline BL14B2 at SPring-8 in Hyogo, Japan. Transmission electron microscopy (TEM) images were obtained using a JEOL JEM-ARM200F (accelerating voltage: 200 kV) equipped with a CCD camera. The specimens for TEM were prepared by placing drops of the sample dispersed in EtOH onto a 200-mesh copper grid coated with an amorphous carbon film with holes. X-ray photoelectron spectroscopy (XPS; JPS9030, JEOL Ltd) was performed using Al K $\alpha$  radiation, and the binding energy scale was calibrated using the C 1s peak at 285.0 eV

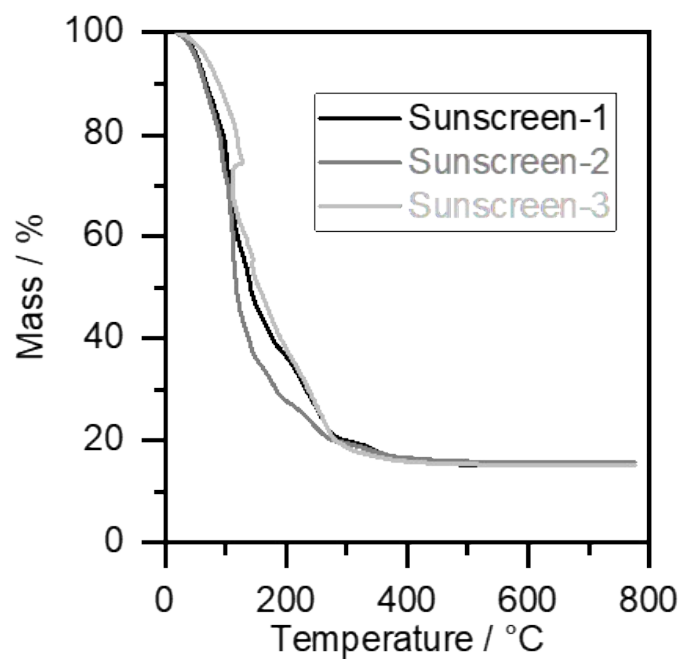

Figure S1. Thermogravimetry profiles of sunscreen products. Gas condition: air.

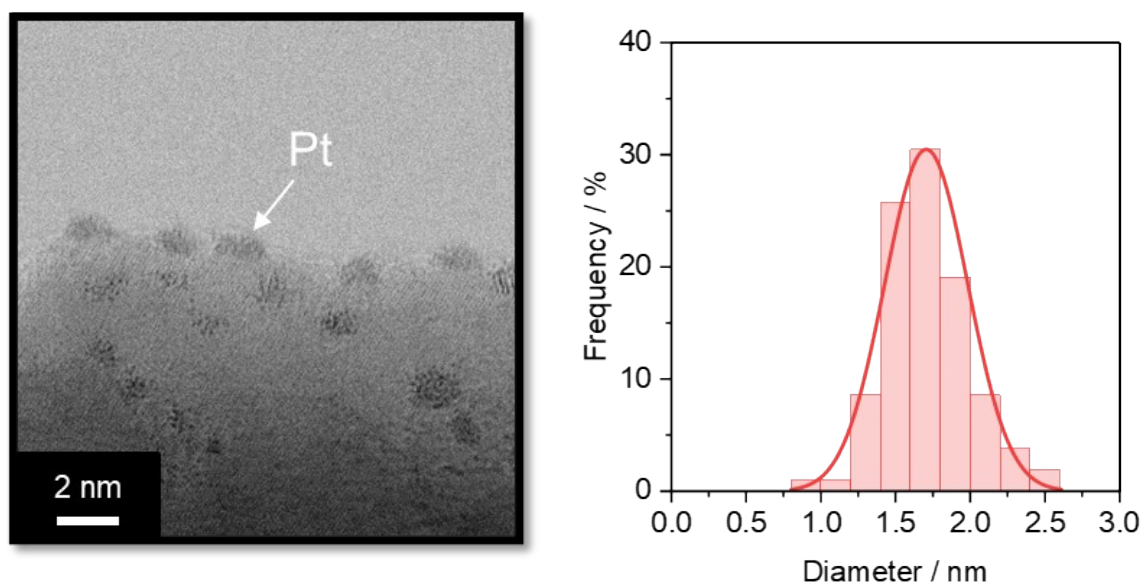

Figure S2. (a) HR-TEM image and (b) Pt particle size distribution over Pt/ZnO derived from unmodified ZnO.

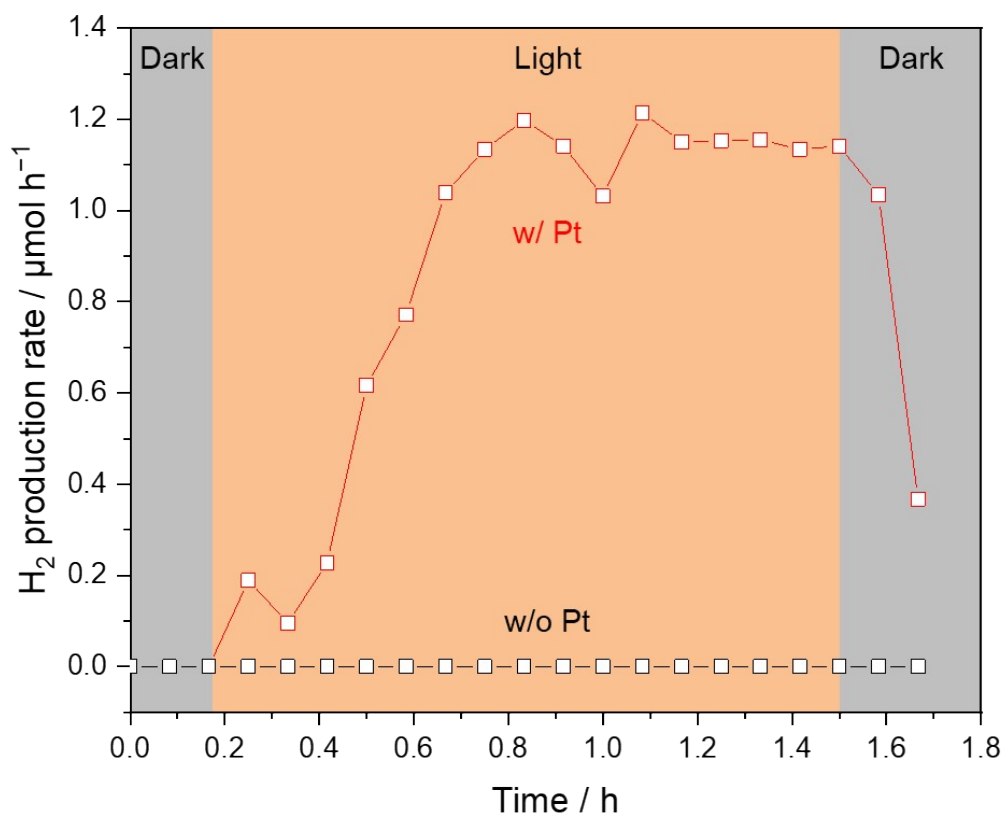

Figure S3. Photocatalytic hydrogen production performance during Pt/ZnO synthesis. Reactions solution: ZnO (30 mg) + H<sub>2</sub>O (3 mL) + EtOH (2 mL) + 0.04 M H<sub>2</sub>PtCl<sub>6</sub> aqueous solution (40 μL).

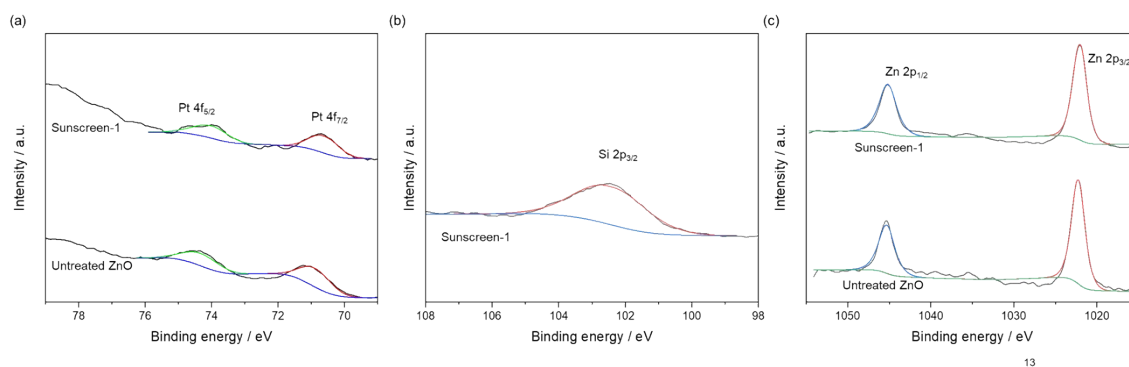

Figure S4. XPS spectra of Pt deposited ZnO derived from untreated ZnO and Sunscreen-1 in the region of (a) Pt 4f, (b) Si 2p, and (c) Zn 2p.

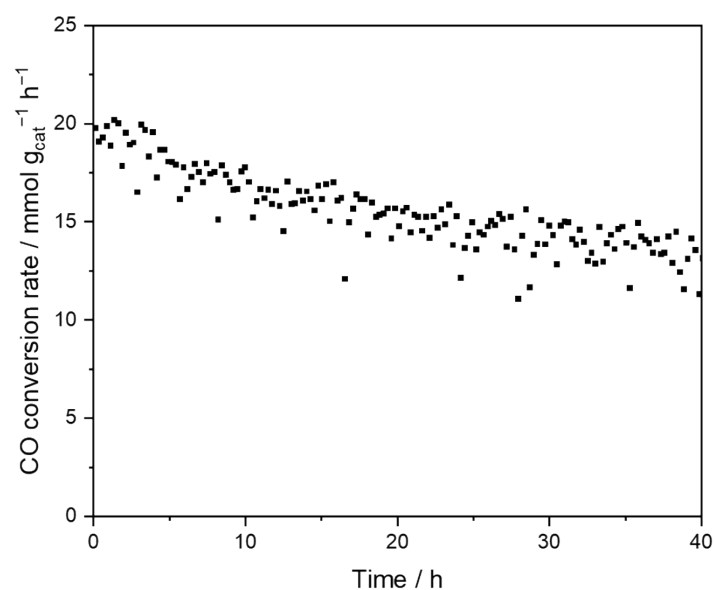

Figure S5. CO oxidation performance of Pt deposited ZnO catalysts derived from the sunscreen product-1. Reaction conditions: Catalyst weight=1.3 mg (diluted by 78.7 mg of Al<sub>2</sub>O<sub>3</sub>; dilution ratio = 60). Pretreatment condition: pure H<sub>2</sub>, 300 °C, 30 min. Reaction condition: CO=0.10 kPa and O<sub>2</sub>=10 kPa (Ar balance), flow rate 100 mL min<sup>-1</sup> (WHSV = 4615 L g<sup>-1</sup> h<sup>-1</sup>), 170 °C.

- 1 A. D. Allian, K. Takanabe, K. L. Furdala, X. Hao, T. J. Truex, J. Cai, C. Buda, M. Neurock and E. Iglesia, *J. Am. Chem. Soc.*, 2011, **133**, 4498–4517.
